# Supplementary material for: Supramolecular architecture of theophylline polymorphs, monohydrate and co-crystals with iodine: study from the energetic viewpoint
Source: Royal Society of Chemistry journal article supplement (doi:10.1039/d4ra04368e), 2024-01-01
Supplement: d4ra04368e1.pdf [file d4ra04368e1.pdf]

**Supporting information for**

**What is the actual supramolecular architecture of theophylline polymorphic modifications  
and co-crystals with water and iodine from energetic viewpoint?**

**I.S. Konovalova<sup>a,b,\*</sup>, S.V. Shishkina<sup>a</sup>, M. Wyshusek<sup>b</sup>, Michael Patzer<sup>d</sup> and G.J. Reiss<sup>b</sup>**

<sup>a</sup>SSI “Institute for Single Crystals”, National Academy of Science of Ukraine, 60 Nauky Ave., Kharkiv 61001, Ukraine

\*E-mail: ikonovalova0210@gmail.com

<sup>b</sup> Institut für Bioanorganische Chemie Heinrich-Heine-Universität Dusseldorf, Universitätsstrasse 1, 40225 Dusseldorf, Germany

<sup>c</sup> Institute of Organic Chemistry, National Academy of Sciences of Ukraine, Akademika Kukharya Street 5, Kyiv, 02094, Ukraine

<sup>d</sup> Max-Planck-Institut für Kohlenforschung, Kaiser-Wilhelm-Platz 1, 45470 Mülheim an der Ruhr, Germany

**Table S1.** Symmetry codes, bonding type, interaction energy of the basic building unit with neighbouring ones ( $E_{\text{int}}$ , kcal/mol) and the contribution of this energy to the total interaction energy (%) in the crystal of **1**.

| Dimer | Symmetry operation   | $E_{\text{int}}$ , kcal/mol | Energy ratio (ER), % | Interaction                     |
|-------|----------------------|-----------------------------|----------------------|---------------------------------|
| 1-m1  | $-1/2+x,-y,1/2+z$    | -12.1                       | 20.3                 | N1-H...N2 1.84 Å, 174°          |
| 1-m2  | $1/2+x,-y,-1/2+z$    | -12.1                       | 20.3                 | N1-H...N2 1.84 Å, 174°          |
| 1-m3  | $-1+x,y,z$           | -8.1                        | 13.5                 | stacking, C2...C5 3.42 Å        |
| 1-m4  | $1+x,y,z$            | -8.1                        | 13.5                 | stacking, C2...C5 3.42 Å        |
| 1-m5  | $-1/2+x,-y,-1/2+z$   | -4.2                        | 7.0                  | C1-H...C7( $\pi$ ) 3.09 Å, 133° |
| 1-m6  | $1/2+x,-y,1/2+z$     | -4.2                        | 7.0                  | C1-H...C7( $\pi$ ) 3.09 Å, 133° |
| 1-m7  | $-1/2+x,-1-y,-1/2+z$ | -2.0                        | 3.3                  | C5-H...O2 2.70 Å, 155°          |
| 1-m8  | $1/2+x,-1-y,1/2+z$   | -2.0                        | 3.3                  | C5-H...O2 2.70 Å, 155°          |
| 1-m9  | $x,y,-1+z$           | -1.9                        | 3.2                  | C4-H...O1 2.47 Å, 149°          |
| 1-m10 | $x,y,1+z$            | -1.9                        | 3.2                  | C4-H...O1 2.47 Å, 149°          |
| 1-m11 | $-1/2+x,-1-y,1/2+z$  | -1.6                        | 2.7                  | H5B...H4A 2.48 Å                |
| 1-m12 | $1/2+x,-1-y,-1/2+z$  | -1.6                        | 2.7                  | H5B...H4A 2.48 Å                |

**Table S2.** Symmetry codes, bonding type, interaction energy of the basic building unit with neighbouring ones ( $E_{\text{int}}$ , kcal/mol) and the contribution of this energy to the total interaction energy (%) in the crystal of **2**

| Dimer | Symmetry operation      | $E_{\text{int}}$ , kcal/mol | Energy ratio (ER), % | Interaction              |
|-------|-------------------------|-----------------------------|----------------------|--------------------------|
| 2-m1  | $-1/2+x, 3/2-y, 1+z$    | -10.8                       | 18.2                 | N1-H...O2 1.79 Å, 153°   |
| 2-m2  | $1/2+x, 3/2-y, -1+z$    | -10.8                       | 18.2                 | N1-H...O2 1.79 Å, 153°   |
| 2-m3  | $x, y, -1+z$            | -8.0                        | 13.5                 | stacking, C7...N4 3.40 Å |
| 2-m4  | $x, y, 1+z$             | -8.0                        | 13.5                 | stacking, C7...N4 3.40 Å |
| 2-m5  | $-1/2+x, 3/2-y, z$      | -4.0                        | 6.8                  | C4-H...O1 2.29 Å, 173°   |
| 2-m6  | $1/2+x, 3/2-y, z$       | -4.0                        | 6.8                  | C4-H...O1 2.29 Å, 173°   |
| 2-m7  | $2-x, 1-y, -1/2+z$      | -3.3                        | 5.6                  | C1-H...N2 2.28 Å, 151°   |
| 2-m8  | $2-x, 1-y, 1/2+z$       | -3.3                        | 5.6                  | C1-H...N2 2.28 Å, 151°   |
| 2-m9  | $2-x, 2-y, -1/2+z$      | -1.7                        | 2.9                  | non-specific             |
| 2-m10 | $2-x, 2-y, 1/2+z$       | -1.7                        | 2.9                  | non-specific             |
| 2-m11 | $3/2-x, -1/2+y, -1/2+z$ | -0.9                        | 1.5                  | non-specific             |
| 2-m12 | $3/2-x, -1/2+y, 1/2+z$  | -0.9                        | 1.5                  | non-specific             |
| 2-m13 | $3/2-x, 1/2+y, -1/2+z$  | -0.9                        | 1.5                  | non-specific             |
| 2-m14 | $3/2-x, 1/2+y, 1/2+z$   | -0.9                        | 1.5                  | non-specific             |

**Table S3.** Symmetry codes, bonding type, interaction energy of the basic building unit with neighbouring ones ( $E_{\text{int}}$ , kcal/mol) and the contribution of this energy to the total interaction energy (%) in the crystal of **3**

| Dimer | Symmetry operation      | $E_{\text{int}}$ , kcal/mol | Energy ratio (ER), % | Interaction              |
|-------|-------------------------|-----------------------------|----------------------|--------------------------|
| 3-m1  | $1/2-x, -1/2+y, 1/2+z$  | -10.3                       | 17.2                 | N1-H...N2 1.77 Å, 178°   |
| 3-m2  | $1/2-x, 1/2+y, -1/2+z$  | -10.3                       | 17.2                 | N1-H...N2 1.77 Å, 178°   |
| 3-m3  | $x, -1+y, z$            | -8.1                        | 13.5                 | stacking, C1...N2 3.41 Å |
| 3-m4  | $x, 1+y, z$             | -8.1                        | 13.5                 | stacking, C1...N2 3.41 Å |
| 3-m5  | $1/2-x, -1/2+y, -1/2+z$ | -4.8                        | 7.9                  | C1-H...O1 2.23 Å, 158°   |
| 3-m6  | $1/2-x, 1/2+y, 1/2+z$   | -4.8                        | 7.9                  | C1-H...O1 2.23 Å, 158°   |
| 3-m7  | $1-x, 2-y, -1/2+z$      | -2.0                        | 3.2                  | C5-H...O2 2.59 Å, 133°   |
| 3-m8  | $1-x, 2-y, 1/2+z$       | -2.0                        | 3.2                  | C5-H...O2 2.59 Å, 133°   |
| 3-m9  | $1-x, 3-y, -1/2+z$      | -1.9                        | 3.1                  | C5-H...O2 2.63 Å, 110°   |
| 3-m10 | $1-x, 3-y, 1/2+z$       | -1.9                        | 3.1                  | C5-H...O2 2.63 Å, 110°   |
| 3-m11 | $x, y, -1+z$            | -1.7                        | 2.8                  | non-specific             |
| 3-m12 | $x, y, 1+z$             | -1.7                        | 2.8                  | non-specific             |
| 3-m13 | $x, -1+y, 1+z$          | -1.3                        | 2.2                  | non-specific             |
| 3-m14 | $x, 1+y, -1+z$          | -1.3                        | 2.2                  | non-specific             |

**Table S4.** Symmetry codes, bonding type, interaction energy of the basic building unit with neighbouring ones ( $E_{\text{int}}$ , kcal/mol) and the contribution of this energy to the total interaction energy (%) in the crystal of **4**.

| Dimer                         | Symmetry operation | $E(\text{int})$ ,<br>kcal/mol | Energy ratio<br>(ER), % | Interaction               |
|-------------------------------|--------------------|-------------------------------|-------------------------|---------------------------|
| Monomeric building unit (MBU) |                    |                               |                         |                           |
| 4-m1                          | -1-x,-1-y,-z       | -20.3                         | 32.3                    | N1-H...O1 1.77 Å, 178°    |
| 4-m2                          | -1+x, y, z         | -8.1                          | 12.9                    | C-H... $\pi$ 2.74 Å, 141° |
| 4-m3                          | 1+x, y, z          | -8.1                          | 12.9                    | C-H... $\pi$ 2.74 Å, 141° |
| 4-m4                          | -x,-1-y,-z         | -5.9                          | 9.4                     | non-specific              |
| 4-m5                          | -1+x,-1/2-y,-1/2+z | -4.3                          | 6.8                     | C1-H...O2 2.11 Å, 165°    |
| 4-m6                          | 1+x,-1/2-y,1/2+z   | -4.3                          | 6.8                     | C1-H...O2 2.11 Å, 165°    |
| 4-m7                          | -x,-y,-z           | -3.4                          | 5.4                     | C-H... $\pi$ 2.72 Å, 158° |
| 4-m8                          | x,-1/2-y,-1/2+z    | -1.8                          | 2.9                     | non-specific              |
| 4-m9                          | x,-1/2-y,1/2+z     | -1.8                          | 2.9                     | non-specific              |
| 4-m10                         | 1-x,-y,-z          | -1.5                          | 2.4                     | non-specific              |
| 4-m11                         | 1-x,-1/2+y,1/2-z   | -1.1                          | 1.8                     | non-specific              |
| 4-m12                         | 1-x,1/2+y,1/2-z    | -1.1                          | 1.8                     | non-specific              |
| Dimeric building unit (DBU)   |                    |                               |                         |                           |
| 4-d1                          | -1+x,y,z           | -21.7                         | 25.1                    | stacking, C6...C7 3.41 Å  |
| 4-d2                          | 1+x,y,z            | -21.7                         | 25.1                    | stacking, C6...C7 3.41 Å  |
| 4-d3                          | -1+x,-3/2-y,-1/2+z | -4.5                          | 5.3                     | C1-H...O2 2.11 Å, 165°    |
| 4-d4                          | -1+x,-1/2-y,-1/2+z | -4.5                          | 5.3                     | C1-H...O2 2.11 Å, 165°    |
| 4-d5                          | 1+x,-3/2-y,1/2+z   | -4.5                          | 5.3                     | C1-H...O2 2.11 Å, 165°    |
| 4-d6                          | 1+x,-1/2-y,1/2+z   | -4.5                          | 5.3                     | C1-H...O2 2.11 Å, 165°    |
| 4-d7                          | -1+x,-1+y,z        | -3.6                          | 4.2                     | C4-H...N2 2.72 Å, 158°    |
| 4-d8                          | 1+x,1+y,z          | -3.6                          | 4.2                     | C4-H...N2 2.72 Å, 158°    |
| 4-d9                          | x,-3/2-y,-1/2+z    | -2.1                          | 2.4                     | C5-H...N2 2.65 Å, 167°    |
| 4-d10                         | x,-3/2-y,1/2+z     | -2.1                          | 2.4                     | C5-H...N2 2.65 Å, 167°    |
| 4-d11                         | x,-1/2-y,-1/2+z    | -2.1                          | 2.4                     | C5-H...N2 2.65 Å, 167°    |
| 4-d12                         | x,-1/2-y,1/2+z     | -2.1                          | 2.4                     | C5-H...N2 2.65 Å, 167°    |
| 4-d13                         | -2+x,-3/2-y,-1/2+z | -1.6                          | 1.8                     | non-specific              |
| 4-d14                         | -2+x,-1/2-y,-1/2+z | -1.6                          | 1.8                     | non-specific              |
| 4-d15                         | 2+x,-3/2-y,1/2+z   | -1.6                          | 1.8                     | non-specific              |
| 4-d16                         | 2+x,-1/2-y,1/2+z   | -1.6                          | 1.8                     | non-specific              |
| 4-d17                         | -2+x,-1+y,z        | -1.5                          | 1.7                     | non-specific              |
| 4-d18                         | 2+x,1+y,z          | -1.5                          | 1.7                     | non-specific              |

**Table S5.** Symmetry codes, bonding type, interaction energy of the basic building unit with neighbouring ones ( $E_{\text{int}}$ , kcal/mol) and the contribution of this energy to the total interaction energy (%) in the crystal of **5**

| Dimer                         | Symmetry operation | $E(\text{int})$ ,<br>kcal/mol | Energy ratio<br>(ER),% | Interaction          |
|-------------------------------|--------------------|-------------------------------|------------------------|----------------------|
| Monomeric building unit (MBU) |                    |                               |                        |                      |
| 5-m1                          | -x,-1/2+y,1/2-z    | -3.6                          | 4.1                    | C-H...O 2.31 Å, 140° |
| 5-m2                          | -1+x,1/2-y,-1/2+z  | -2.1                          | 2.4                    | non-specific         |
| 5-m3                          | -x,1/2+y,1/2-z     | -3.6                          | 4.1                    | C-H...O 2.31 Å, 140° |
| 5-m4                          | -x,1-y,1-z         | -14.2                         | 16                     | stacking 3.39 Å      |
| 5-m5                          | -1+x,1+y,z         | -3.5                          | 3.9                    | C-H...O 2.61 Å, 114° |
| 5-m6                          | 1-x,-1/2+y,1/2-z   | -3.2                          | 3.6                    | non-specific         |
| 5-m7                          | 1-x,-y,1-z         | -10.5                         | 11.8                   | stacking 3.47 Å      |
| 5-m8                          | 1-x,-1/2+y,3/2-z   | -1.6                          | 1.8                    | non-specific         |
| 5-m9                          | x,1/2-y,-1/2+z     | -4.5                          | 5.1                    | C-H...N 2.2 Å, 164°  |
| 5-m10                         | 1-x,1/2+y,1/2-z    | -3.2                          | 3.6                    | non-specific         |
| 5-m11                         | 1-x,1-y,1-z        | -21                           | 23.6                   | stacking 3.29 Å      |
| 5-m12                         | x,1/2-y,1/2+z      | -4.5                          | 5.1                    | C-H...N 2.2 Å, 164°  |
| 5-m13                         | 1-x,1/2+y,3/2-z    | -1.6                          | 1.8                    | non-specific         |
| 5-m14                         | x,3/2-y,-1/2+z     | -0.9                          | 1.1                    | non-specific         |
| 5-m15                         | x,3/2-y,1/2+z      | -0.9                          | 1.1                    | non-specific         |
| 5-m16                         | 1+x,-1+y,z         | -3.5                          | 3.9                    | C-H...O 2.61 Å, 114° |
| 5-m17                         | 2-x,-y,1-z         | -4.2                          | 4.7                    | C-H...O 2.47 Å, 159° |
| 5-m18                         | 1+x,1/2-y,1/2+z    | -2.1                          | 2.4                    | non-specific         |
| Dimeric building unit (DBU)   |                    |                               |                        |                      |
| 5-d1                          | -1+x,y,z           | -16.7                         | 11.8                   | stacking 3.39 Å      |
| 5-d2                          | 1+x,y,z            | -16.7                         | 11.8                   | stacking 3.39 Å      |
| 5-d3                          | x,-1+y,z           | -11.2                         | 7.9                    | stacking 3.47 Å      |
| 5-d4                          | x,1+y,z            | -11.2                         | 7.9                    | stacking 3.47 Å      |
| 5-d5                          | -1+x,1+y,z         | -10.8                         | 7.6                    | C-H...O 2.61 Å, 114° |
| 5-d6                          | 1+x,-1+y,z         | -10.8                         | 7.6                    | C-H...O 2.61 Å, 114° |
| 5-d7                          | 1-x,-1/2+y,1/2-z   | -9.9                          | 7                      | C-H...N 2.2 Å, 164°  |
| 5-d8                          | 1-x,-1/2+y,3/2-z   | -9.9                          | 7                      | C-H...N 2.2 Å, 164°  |
| 5-d9                          | 1-x,1/2+y,1/2-z    | -9.9                          | 7                      | C-H...N 2.2 Å, 164°  |
| 5-d10                         | 1-x,1/2+y,3/2-z    | -9.9                          | 7                      | C-H...N 2.2 Å, 164°  |
| 5-d11                         | -x,-1/2+y,1/2-z    | -6.1                          | 4.3                    | C-H...O 2.31 Å, 140° |
| 5-d12                         | -x,1/2+y,1/2-z     | -6.1                          | 4.3                    | C-H...O 2.31 Å, 140° |
| 5-d13                         | 2-x,-1/2+y,3/2-z   | -6.1                          | 4.3                    | C-H...O 2.31 Å, 140° |
| 5-d14                         | 2-x,1/2+y,3/2-z    | -6.1                          | 4.3                    | C-H...O 2.31 Å, 140° |

**Table S6.** Symmetry codes, bonding type, interaction energy of the basic building unit with neighbouring ones ( $E_{\text{int}}$ , kcal/mol) and the contribution of this energy to the total interaction energy (%) in the crystal of **6**.

| Dimer | Symmetry operation | $E(\text{int})$ ,<br>kcal/mol | Energy ratio<br>(ER),% | Interaction          |
|-------|--------------------|-------------------------------|------------------------|----------------------|
| 6-d1  | $-1+x,y,z$         | -19                           | 15.4                   | Stacking 3.35 Å      |
| 6-d2  | $1+x,y,z$          | -19                           | 15.4                   | Stacking 3.35 Å      |
| 6-d3  | $x,y,z$            | -6.2                          | 5                      | O-H...N 1.91 Å, 164° |
| 6-d4  | $x,y,z$            | -6.2                          | 5                      | O-H...N 1.94 Å, 164° |
| 6-d5  | $1-x,-1/2+y,2-z$   | -4.2                          | 3.4                    | C-H...O 2.64 Å, 126° |
| 6-d6  | $1-x,1/2+y,2-z$    | -4.2                          | 3.4                    | C-H...O 2.64 Å, 126° |
| 6-d7  | $-x,-1/2+y,1-z$    | -3.9                          | 3.2                    | C-H...O 2.64 Å, 126° |
| 6-d8  | $-x,1/2+y,1-z$     | -3.9                          | 3.2                    | C-H...O 2.64 Å, 126° |
| 6-d9  | $-1-x,-1/2+y,1-z$  | -3.3                          | 2.7                    | C-H...O 2.11 Å, 176° |
| 6-d10 | $-1-x,1/2+y,1-z$   | -3.3                          | 2.7                    | C-H...O 2.11 Å, 176° |
| 6-d11 | $2-x,-1/2+y,2-z$   | -3.2                          | 2.6                    | C-H...O 2.11 Å, 176° |
| 6-d12 | $2-x,1/2+y,2-z$    | -3.2                          | 2.6                    | C-H...O 2.11 Å, 176° |
| 6-d13 | $-x,1/2+y,1-z$     | -1.1                          | 0.9                    | C-H...O 2.50 Å, 154° |
| 6-d14 | $1-x,-1/2+y,2-z$   | -1.0                          | 0.8                    | C-H...O 2.50 Å, 154° |

Table S7. Symmetry codes, bonding type, interaction energy of the basic building unit with neighbouring ones ( $E_{\text{int}}$ , kcal/mol) and the contribution of this energy to the total interaction energy (%) in the crystal of **7**.

| Dimer | Symmetry operation | $E_{\text{int}}$ ,<br>kcal/mol | Energy ratio<br>(ER),% | Interaction             |
|-------|--------------------|--------------------------------|------------------------|-------------------------|
| 7-d1  | -1-x,1-y,1-z       | -13.4                          | 9.9                    | $\pi \dots \pi$ 3.21 Å  |
| 7-d2  | 1-x,1-y,1-z        | -13.4                          | 9.9                    | $\pi \dots \pi$ 3.21 Å  |
| 7-d3  | x,y,z              | -9.9                           | 7.3                    | I...N 2.89 Å, 177°      |
| 7-d4  | x,1+y,z            | -9.9                           | 7.3                    | I...N 2.89 Å, 177°      |
| 7-d5  | -x,-1/2+y,1/2-z    | -5.8                           | 4.2                    | C-H...N 2.72 Å, 166°    |
| 7-d6  | -x,-1/2+y,3/2-z    | -5.8                           | 4.3                    | C-H...N 2.72 Å, 166°    |
| 7-d7  | -x,1/2+y,3/2-z     | -5.8                           | 4.3                    | C-H...N 2.72 Å, 166°    |
| 7-d8  | -x,1/2+y,1/2-z     | -5.8                           | 4.3                    | C-H...N 2.72 Å, 166°    |
| 7-d9  | -x,1/2+y,1/2-z     | -5.1                           | 3.8                    | I... $\pi$ 2.89 Å, 177° |
| 7-d10 | -x,1/2+y,3/2-z     | -5.1                           | 3.8                    | I... $\pi$ 2.89 Å, 177° |
| 7-d11 | -1-x,1/2+y,3/2-z   | -3.2                           | 2.4                    | C-H...O 2.27 Å, 151°    |
| 7-d12 | 1-x,-1/2+y,1/2-z   | -3.2                           | 2.4                    | C1-H...O2 2.27 Å, 151°  |
| 7-d13 | 1-x,1/2+y,1/2-z    | -3.2                           | 2.4                    | C1-H...O2 2.27 Å, 151°  |
| 7-d14 | -1-x,1/2+y,3/2-z   | -1.6                           | 1.2                    | non-specific            |
| 7-d15 | 1-x,1/2+y,1/2-z    | -1.6                           | 1.2                    | non-specific            |
| 7-d16 | -1+x,1+y,z         | -1.2                           | 0.9                    | C4-H...I 3.20 Å, 128°   |
| 7-d17 | 1+x,y,z            | -1.2                           | 0.9                    | C4-H...I 3.20 Å, 128°   |
